# Supplementary material for: Long-Term Effects of Bariatric Surgery on Gut Microbiota Composition and Faecal Metabolome Related to Obesity Remission
Source: MDPI journal article supplement (doi:10.3390/nu13082519), 2021-07-23
Supplement: s1 [file s1]

**Supplementary materials**

**Long-term effects of bariatric surgery on gut microbiota composition  
and faecal metabolome related to obesity remission**

M. Juárez-Fernández<sup>1</sup>, S. Román-Sagüillo<sup>1</sup>, D. Porras<sup>1</sup>, M.V. García-Mediavilla<sup>1,2</sup>, P. Linares<sup>3</sup>, M.D. Ballesteros-Pomar<sup>4</sup>, A. Urioste-Fondo<sup>4</sup>, B. Álvarez-Cuenllas<sup>3</sup>, J. González-Gallego<sup>1,2</sup>, S. Sánchez-Campos<sup>1,2</sup>, F. Jorquera<sup>1,2,3</sup>, E. Nistal<sup>1,2</sup>

<sup>1</sup>Instituto Universitario de Biomedicina (IBIOMED), Universidad de León, León, Spain

<sup>2</sup>Centro de Investigación Biomédica en Red de Enfermedades Hepáticas y Digestivas (CIBERehd), Instituto de Salud Carlos III, Madrid, Spain

<sup>3</sup>Servicio de Aparato Digestivo, Complejo Asistencial Universitario de León, León, Spain

<sup>4</sup>Departamento de Endocrinología y Nutrición, Complejo Asistencial Universitario de León, León, Spain

**SUPPLEMENTARY MATERIALS**

**Table S1 ..... 2**

**Figure S1..... 3**

**Figure S2..... 4**

**Figure S3..... 5**

## Table S1

**Table S1.** Evolution of body weight loss of the patients after bariatric surgery.

| Body weight loss (%) |                      |                      |                      |
|----------------------|----------------------|----------------------|----------------------|
| 1 <sup>st</sup> year | 2 <sup>nd</sup> year | 3 <sup>rd</sup> year | 4 <sup>th</sup> year |
| -34.60 ± 2.44        | -35.72 ± 2.77        | -35.61 ± 3.10        | -32.13 ± 2.46        |

Data are presented as mean ± SEM.

**Figure S1**

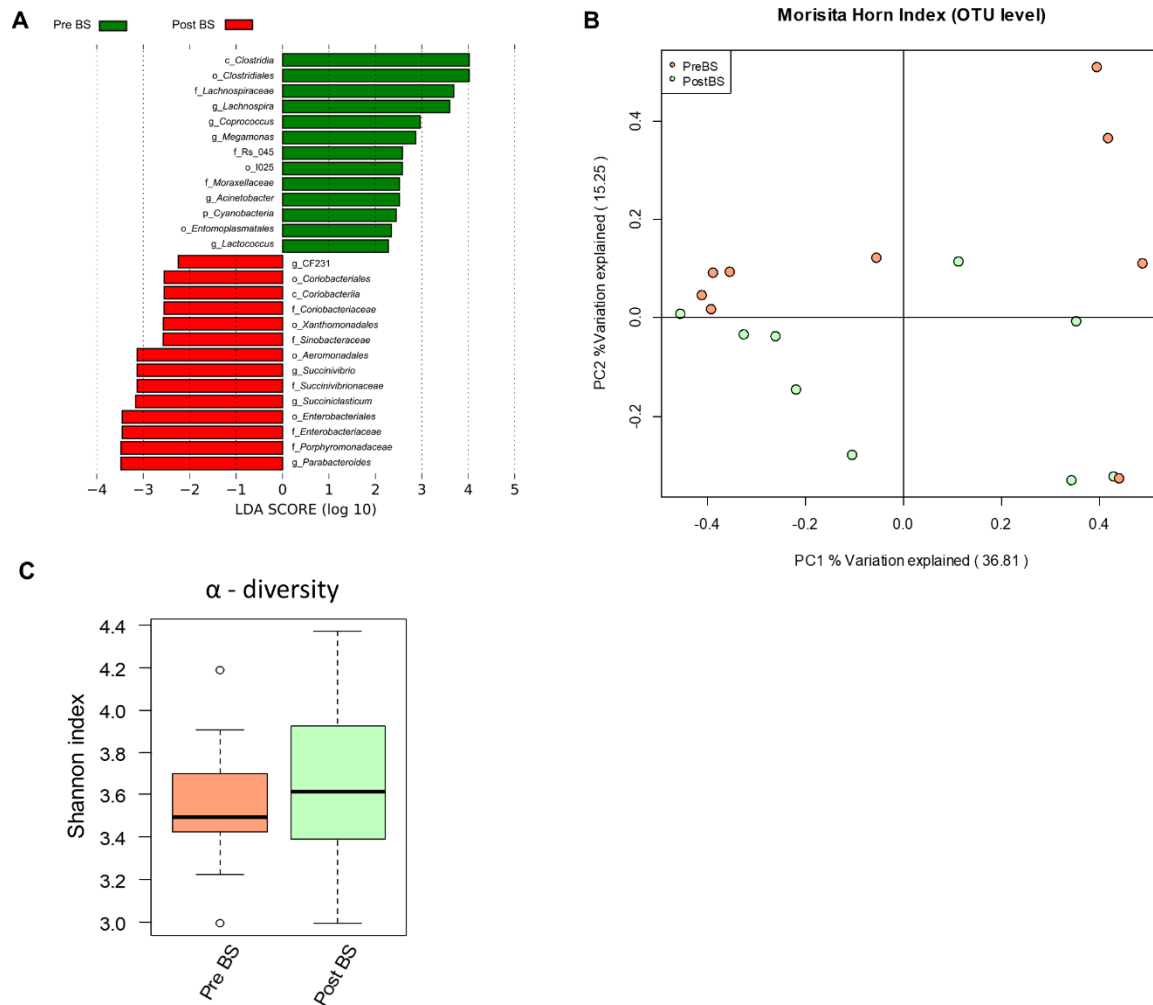

**Figure S1. Effect of bariatric surgery on gut microbiota composition of patients with severe obesity. A.** Linear discriminant analysis effect size (LefSe) showing differences between patients with severe obesity before (Pre BS) and after (Post BS) bariatric surgery. **B.** Principal coordinates analysis (PCoA) plot based on Morisita-Horn dissimilarity index at OTU level of patients with severe obesity Pre BS and Post BS. **C.** Differences in  $\alpha$ -diversity measured by Shannon index of patients with severe obesity Pre BS and Post BS.

**Figure S2**

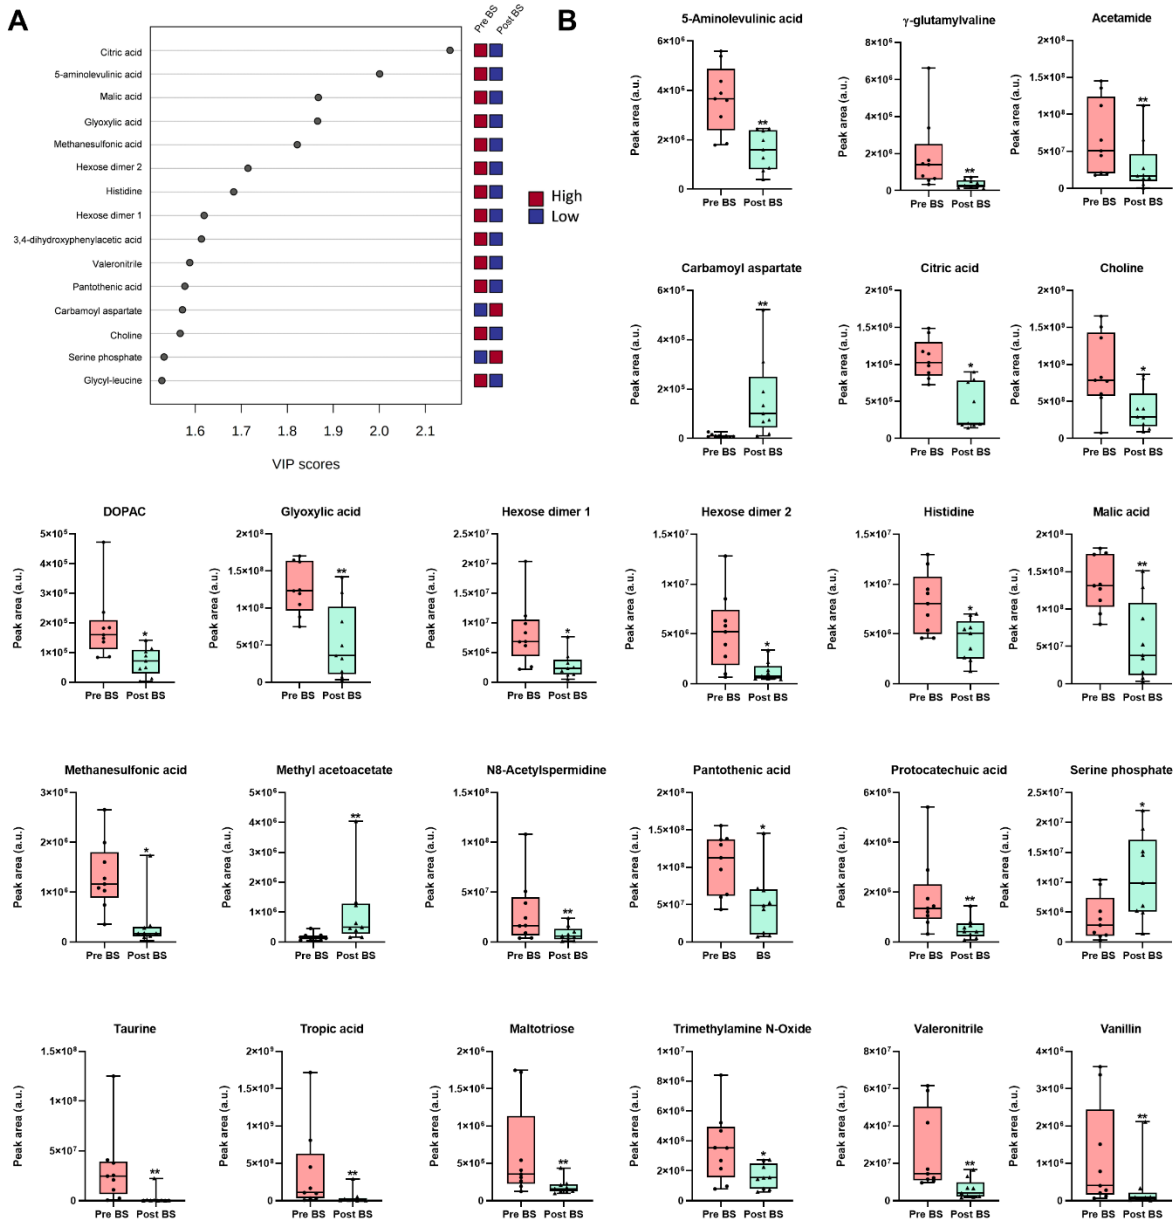

**Figure S2. Effect of bariatric surgery on faecal metabolome of patients with severe obesity.** **A.** Variable importance in projection (VIP) scores from Partial Least-Squares Discriminant Analysis (PLS-DA) of faecal metabolites of patients with severe obesity before (Pre BS) and after (Post BS) bariatric surgery. Red and blue boxes on the right indicate a high and low relative concentration, respectively, of the corresponding metabolite in each group. **B.** Boxplots showing differences in the peak area of different metabolites in patients with severe obesity Pre BS and Post BS. Non-parametric Wilcoxon signed-rank test. \* $p < 0.05$ ; \*\* $p < 0.01$  vs. Pre BS. \* $p < 0.05$ ; \*\* $p < 0.01$  vs. Pre BS.

**Figure S3**

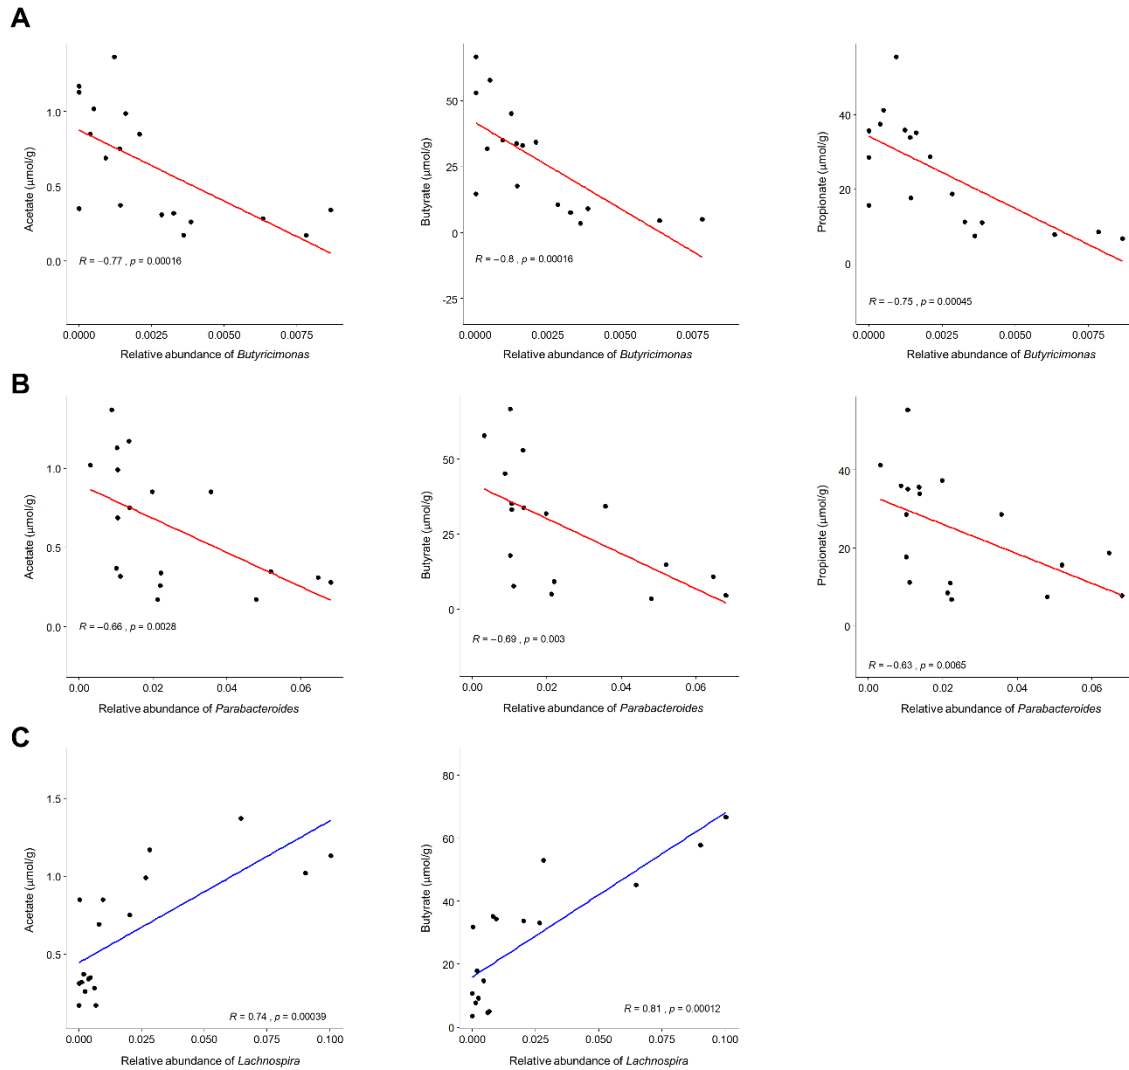

**Figure S3. Associations of gut microbiota profile with faecal short-chain fatty acids concentration.** Spearman correlation coefficients and linear relationships of (A) *Butyricimonas* relative abundance with acetate, butyrate and propionate concentrations; (B) *Parabacteroides* relative abundance with acetate, butyrate and propionate concentrations; (C) *Lachnospira* relative abundance with acetate, and butyrate. \*  $p < 0.05$ .
